# Supplementary material for: Proximate analysis and concordance with nutritional labeling of most sold protein bars in Santiago, Chile
Source: Research Square preprint supplement (doi:10.21203/rs.3.rs-6430129/v1), 2025-04-22
Supplement: Supplementary file 1 [file 19e5c11d931c6a94770aafbc.docx]

**Table 2. Nutrition Labelling and Price of Protein Bars per serving.**

| **Sample** | **B1** | **B2** | **B3** | **B4** | **B5** | **B6** | **B7** | **B8** | **B9** | **B10** |
| --- | --- | --- | --- | --- | --- | --- | --- | --- | --- | --- |
| **Weight (g)** | 60 g | 60 g | 55 g | 55 g | 42 g | 42 g | 45 g | 45 g | 60 g | 60 g |
| **Chilean Peso $** | $ 2.990 | $ 2.990 | $ 2.390 | $ 2.390 | $ 1.990 | $ 1.990 | $ 1.690 | $ 1.690 | $ 4.090 | $ 3.890 |
| **USD $ USD** | $ 3,2 | $ 3,2 | $ 2,5 | $ 2,5 | $ 2,1 | $ 2,1 | $ 1,8 | $ 1,8 | $ 4,3 | $ 4,1 |
| **Calories** | 130 | 130 | 161 | 180 | 112 | 108 | 180 | 160 | 190 | 170 |
| **Protein (g)** | 19 | 21 | 21 | 20 | 15,2 | 15 | 15,1 | 15,4 | 21 | 15 |
| **Fat (g)** | 5,3 | 3,6 | 7,4 | 7,4 | 3,3 | 2 | 6,2 | 3,3 | 8 | 9 |
| **Carbohydrates (g)** | 1,8 | 3,3 | 2,6 | 3 | 5,5 | 7,6 | 15,9 | 17,3 | 9 | 3 |
| **Fibre (g)** | 15 | 18 | 3,2 | 5,9 | 9 | 7,7 | 0 | 1,1 | 13 | 11 |

*USD: US dollar, g: grams*
