# Supplementary material for: Proximate analysis and concordance with nutritional labeling of most sold protein bars in Santiago, Chile
Source: Research Square preprint supplement (doi:10.21203/rs.3.rs-6430129/v1), 2025-04-22
Supplement: Supplementary file 2 [file 3bb04c68c85f766cf518cffd.docx]

| Sample | B1 | B2 | B3 | B4 | B5 | B6 | B7 | B8 | B9 | B10 |
| --- | --- | --- | --- | --- | --- | --- | --- | --- | --- | --- |
| Tagged | 100 g | 100 g | 100 g | 100 g | 100 g | 100 g | 100 g | 100 g | 100 g | 100 g |
| Calories | 216 | 216 | 292 | 327 | 267 | 257 | 400 | 357 | 317 | 283 |
| Proteins | 31,3 | 35 | 37,8 | 36 | 36,1 | 36 | 33,6 | 34,3 | 35 | 26 |
| Fats | 8,8 | 6 | 13,5 | 13,5 | 7,8 | 4,8 | 13,8 | 7,3 | 13 | 17 |
| Carbohydrates | 3 | 5,5 | 4,7 | 5,4 | 13 | 18 | 35,3 | 38,5 | 15 | 6 |
| Fibre | 25,5 | 30,7 | 5,9 | 10,7 | 21,4 | 18,3 | 0 | 2,4 | 22 | 18 |
| Ingredients | Protein Blend (milk protein isolate, whey protein concentrate, whey protein isolate, soy lecithin), isomaltooligosaccharides, dark chocolate (16%) (maltitol, cocoa mass, cocoa butter, soy lecithin, artificial flavoring), water, almond (4%), erythritol, contains less than 2% artificial flavoring, citric acid, potassium sorbate. | Protein Blend (milk protein isolate, whey protein concentrate, whey protein isolate, soy lecithin) oligofructose, isomalt oligosaccharides, almond (8%), water, erythritol, contains less than 2% natural flavoring, citric acid, potassium sorbate, sucralose, sea salt. | White chocolate (26%) (maltitol, cocoa butter, milk powder, soy lecithin, natural flavoring), milk protein, chocolate flavor coating (polydextrose, maltitol, sunflower oil, soy protein, milk protein, artificial flavoring, soy lecithin, hydrolyzed collagen, potassium chloride, cocoa), glycerol, hydrolyzed collagen, hydrolyzed wheat gluten, soy crisps (soy protein, cocoa, tapioca starch), corn soluble fiber, soybean oil, cocoa, artificial flavoring, salt, sucralose. | Chocolate 26% (maltitol, cocoa butter, whole milk powder, cocoa mass, soy lecithin, natural flavors), milk protein, caramel coating 15% (polydextrose, soybean oil, skim milk powder, xylitol, soy lecithin, artificial flavors, salt), glycerol, hydrolyzed wheat gluten, hydrolyzed gelatine, soy protein, corn soluble fiber, soybean oil, peanut 1%, artificial flavors, natural flavoring, salt, sea salt, sucralose. | Soy protein isolate, polydextrose, glycerin, pea protein isolate, chocolate coating (sugar, palm kernel oil, cocoa powder, sunflower lecithin, salt), inulin, cocoa powder (4.6%), tapioca starch, cocoa mass (2%), water, sunflower oil, salt, rice protein, and agar. | Soy crisps (soy protein, tapioca, salt), inulin, glycerin, chocolate 10% (sugar, palm oil, cocoa, cocoa powder, sorbitol, soy lecithin, vanilla), polydextrose, oat flakes, tapioca syrup, whey protein crisps (whey protein isolate, whey protein concentrate, tapioca, calcium carbonate, sunflower lecithin), salted caramel 5%, milk protein concentrate, sunflower oil, natural flavoring, rice protein, agar. | Soy crisps (soy protein isolate, cocoa, tapioca starch), dates, maltitol, whey isolate (milk protein concentrate, soy lecithin), chocolate 10% (cocoa mass, sweetener (maltitol), emulsifier (rapeseed lecithin, polyglycerol polyricinoleate), natural vanilla flavoring), peanut paste and nature identical flavoring | Soy crisps (soy protein isolate, cocoa, tapioca starch), dates, maltitol, whey isolate (milk protein concentrate, soy lecithin), chocolate 10% (cocoa mass, sweetener (maltitol), emulsifier (rapeseed lecithin, polyglycerol polyricinoleate), natural vanilla flavoring), peanut paste and nature identical flavoring. | Protein blend (milk protein isolate, whey protein isolate), polydextrose (prebiotic fiber), almonds, water, cocoa butter, erythritol, glycerin, soluble corn fiber, natural flavors, contains less than 2% cocoa processed with alkali, palm kernel oil, sea salt, sodium caseinate, lecithin (sunflower and/or soy lecithin), xanthan gum, sodium bicarbonate, sucralose, stevia. | Protein blend (milk protein isolate, whey protein isolate), allulose, soluble corn starch, palm kernel oil, water, pecan nuts, cocoa processed with alkali, erythritol, sodium caseinate, contains less than 2 % butter (cream), natural flavors, sea salt, palm oil, carrageenan, sucralose, lecithin (sunflower and/or soya lecithin) |

**Table 1. Nutrition Labelling and Ingredients of Protein Bars per 100g*.***
