# Supplementary material for: Proximate analysis and concordance with nutritional labeling of most sold protein bars in Santiago, Chile
Source: Research Square preprint supplement (doi:10.21203/rs.3.rs-6430129/v1), 2025-04-22
Supplement: Supplementary file 3 [file e5eb060b65731dc400706228.docx]

**Supplementary Table 1. Lot and expiry date of protein bars.**

| N° | 1 | 2 | 3 | 4 | 5 | 6 | 7 | 8 | 9 | 10 |
| --- | --- | --- | --- | --- | --- | --- | --- | --- | --- | --- |
| Lot | 3170-01 | 3149-04 | 3128-J | 3110-J | 23075 | 22298 | MEL9500 | PCH13623 | TM3116522 | NU31235 |
| FV | 19/06/24 | 29/05/24 | 07/05/24 | 19/04/24 | 06/09/24 | 17/04/24 | 07/09/24 | 16/05/24 | 25/04/24 | 03/05/24 |

N: sample number, FV: expiry date.
